# Supplementary material
Source: MDPI journal article supplement (https://www.mdpi.com/2073-4344/12/5/533)
Supplement: s1 [file s1]

Supplementary File

# Photo-induced Preparation of Ag@MOF-801 Composite Based Heterogeneous Nanocatalyst for the Production of Biodiesel

Osamah M. Alduhaish \*, Mohammed Rafi Shaik and Syed Farooq Adil \*

Department of Chemistry, College of Science, King Saud University, P.O. Box 2455, Riyadh 11451, Saudi Arabia; mrshaik@ksu.edu.sa (M.R.S.)

\* Correspondence: oalduhaish@ksu.edu.sa (O.M.A.); sfadil@ksu.edu.sa (S.F.A.); Tel.: +966-11-46-70439 (S.F.A.)

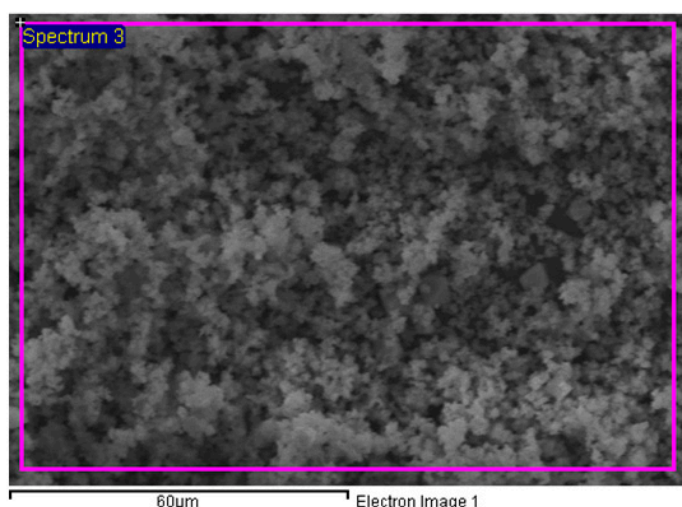

Figure S1: SEM analysis of MOF-801 [1].

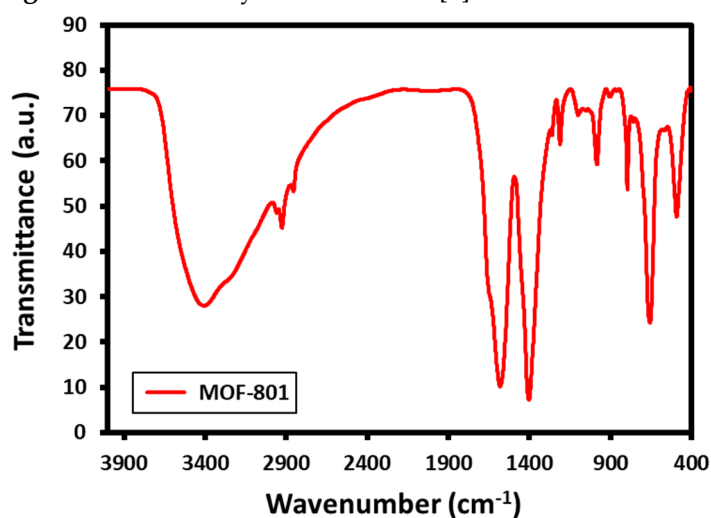

Figure S2: FT-IR analysis of MOF-801 [1].

**Citation:** Alduhaish, O.M.; Shaik, M.R.; Adil, S.F. Photo-Induced Preparation of Ag@MOF-801 Composite Based Heterogeneous Nanocatalyst for the Production of Biodiesel. *Catalysts* **2022**, *12*, 533. <https://doi.org/10.3390/catal12050533>

Academic Editor: Ewa Kowalska

Received: 4 April 2022

Accepted: 5 May 2022

Published: 11 May 2022

**Publisher's Note:** MDPI stays neutral with regard to jurisdictional claims in published maps and institutional affiliations.

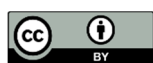

**Copyright:** © 2022 by the authors. Submitted for possible open access publication under the terms and conditions of the Creative Commons Attribution (CC BY) license (<https://creativecommons.org/licenses/by/4.0/>).

## References:

- [1] Shaik, M.R.; Adil, S.F.; ALothman, Z.A.; Alduhaish, O.M. Fumarate Based Metal–Organic Framework: An Effective Catalyst for the Transesterification of Used Vegetable Oil. *Crystals* **2022**, *12*, 151.
